# Supplementary material for: Dexamethasone inhibits Mycobacterium tuberculosis-induced glycolysis but preserves antimicrobial function in primary human macrophages
Source: Research Square preprint supplement (doi:10.21203/rs.3.rs-7129594/v1), 2025-08-05
Supplement: Supplementary file 1 [file 5f3fc1391a5ec2ddd995ec52.pdf]

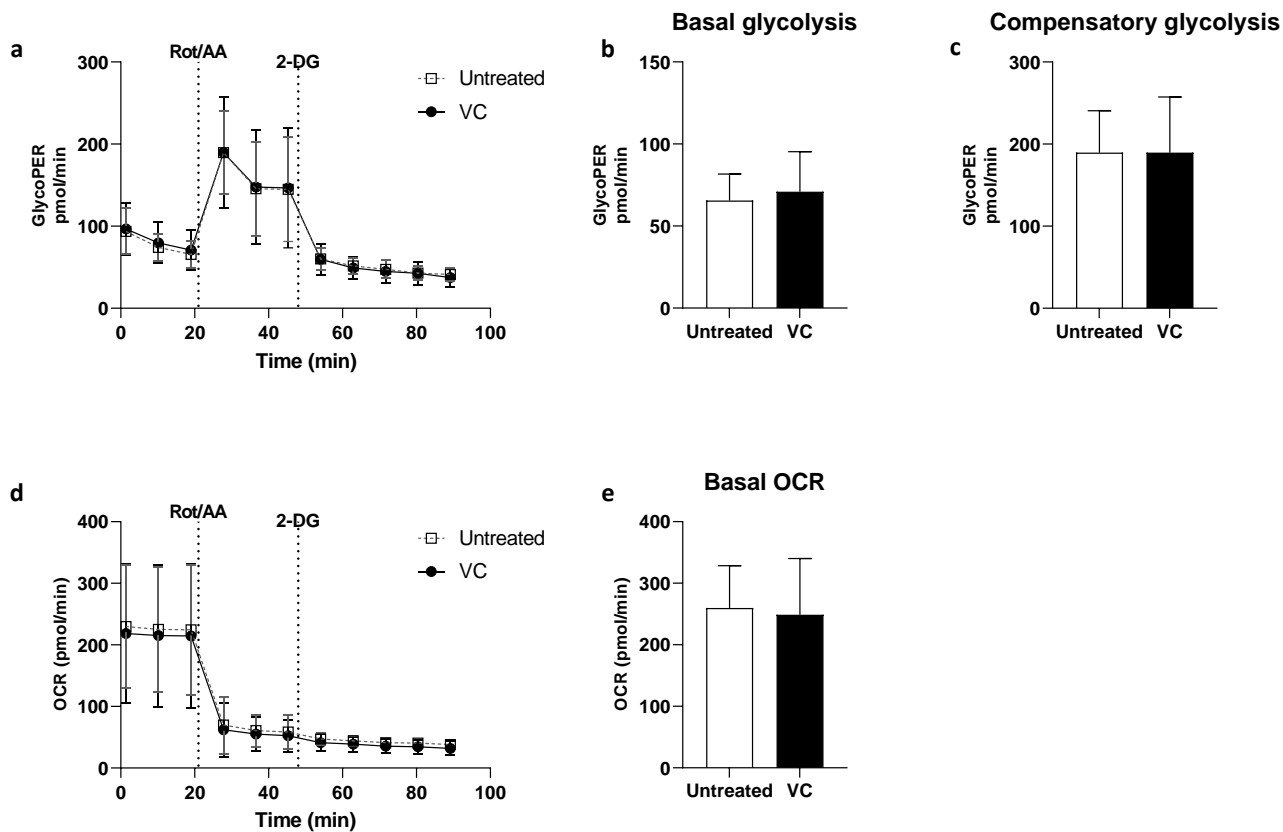

**Supplementary figure 1: There is no difference between in glycolysis or OCR between untreated and vehicle control (VC) treated MDM.** PBMC were isolated from buffy coats and MDM were adherence purified for 7 days in 10% human serum. MDM were cold lifted and seeded on Seahorse culture plates. MDM were left untreated or treated with VC (0.02% ethanol) for 24 hours prior to analysis in the Seahorse XFe24 Analyzer. Rotenone/Antimycin A and 2-DG were injected at set intervals at manufacturer's protocol to acquire ECAR and OCR from which the GlycoPER was derived to calculate the basal and compensatory glycolysis. Cell density was corrected for using Crystal Violet. Data are represented as means  $\pm$  standard deviation.

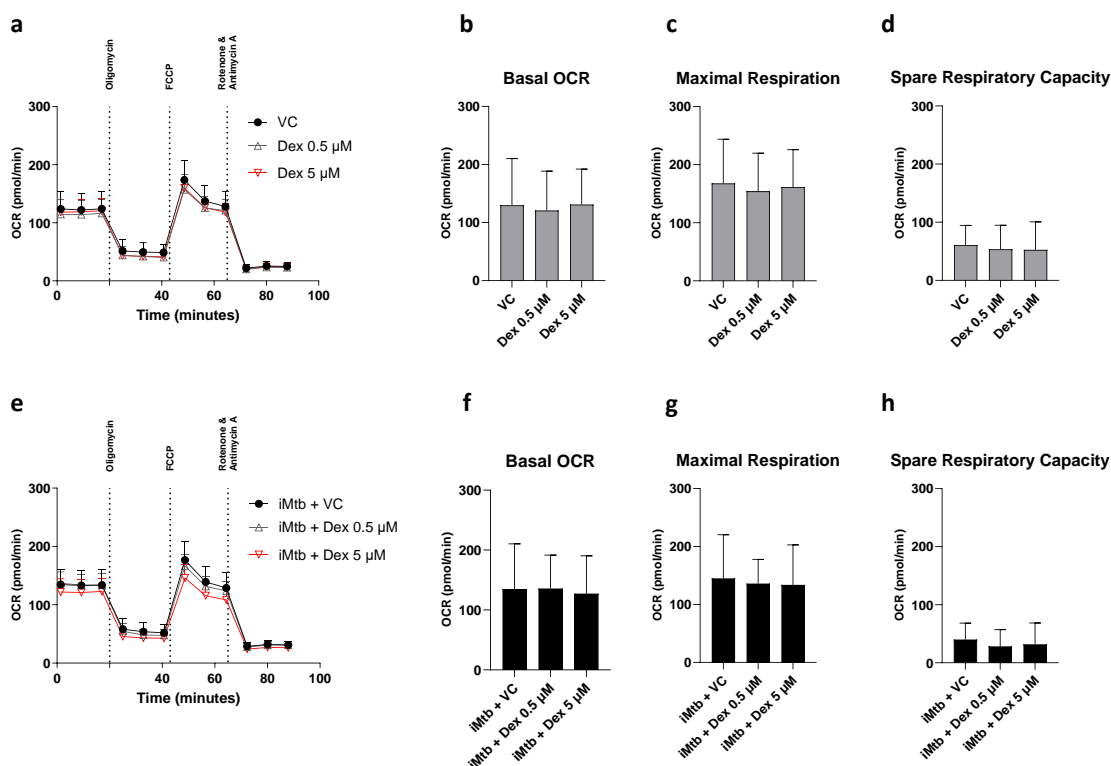

**Supplemental Figure 2: Dexamethasone does not change mitochondrial metabolism in unstimulated or Mtb stimulated human MDM.** PBMC were isolated from buffy coats and MDM were adherence purified for 7 days in 10% human serum. MDM were cold lifted and seeded on Seahorse XFe24 (Agilent) culture plate. MDM were treated with either VC (ethanol 0.02%) or dexamethasone (0.5 or 5  $\mu$ M) for 1 h prior to stimulation with Mtb (iH37Rv; MOI 1-10; Infectivity rate 50-70%). MOI was determined using auramine staining. MitoStress test was performed in the Seahorse XFe24 Analyzer 24 h post stimulation. Oligomycin, FCCP, and Rotenone/Antimycin A were injected at set intervals as per manufacturer's protocol from which basal, maximal, and spare respiratory capacity were calculated from. Collated OCR traces (A,E), basal OCR (B,F), maximal respiration (C,G) and spare respiratory capacity (D,H) of unstimulated (A-D) or Mtb-stimulated (E-H) human MDM are shown. Cell density was corrected for using Crystal Violet. Statistical significance was calculated using One-way ANOVA (Dunnett's Multiple Comparison Test; n= 8).

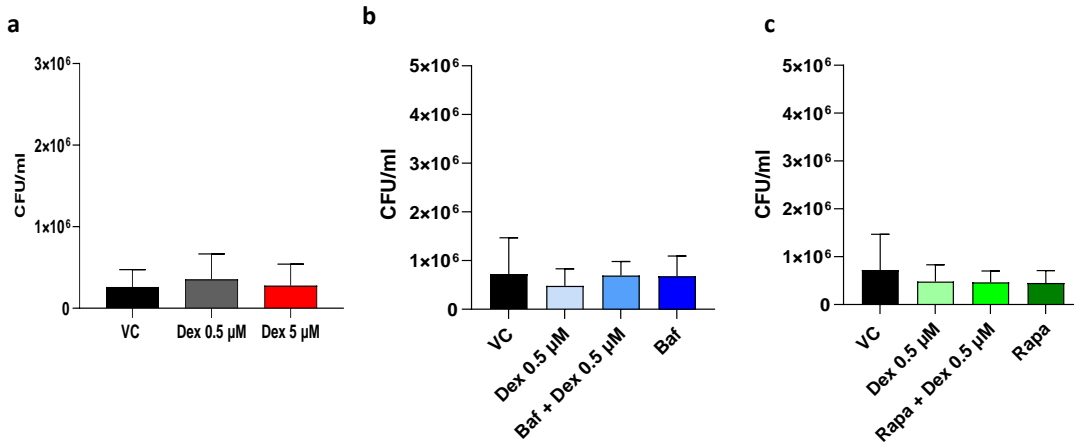

**Supplementary Figure 3: Dexamethasone, bafilomycin or rapamycin does not influence phagocytosis of Mtb by MDM.** PBMC were isolated from buffy coats and MDM were adherence purified for 7 days in 10% human serum. MDM were treated with dexamethasone for 1 hour prior to infection with Mtb (MOI 1-10). MDM were lysed and plated at 3, 48 or 120 h post infection on Middlebrook 7H10 agar supplemented with OADC (A). Alternatively, MDM were treated with bafilomycin A1 (50 nM; blue) for 1 hour (B) or rapamycin (250 ng/ml; green) for 24 h (C) prior to dexamethasone, infected with Mtb and lysed after 3 h and plated on Middlebrook 7H10 agar supplemented with OADC. Data are represented as means ± standard deviation.
